# Supplementary material for: Can We Reliably Detect Respiratory Diseases through Precision Farming? A Systematic Review
Source: MDPI journal article supplement (doi:10.3390/ani13071273), 2023-04-06
Supplement: s1 [file s1]

**Supplementary Table S2.** Data gathered from articles about PLF technologies for swine, bovine and poultry productions. It is presented data about the production stage, production system, and aim of the production for each study included in the review.

| Species | Author | Stage                    | Production system           | Aim of the production |
|---------|--------|--------------------------|-----------------------------|-----------------------|
| Swine   | [30]   | Fattening                | Experimental setup          | Meat                  |
|         | [31]   | Fattening                | Experimental setup          | Meat                  |
|         | [32]   | Finishing                | Conventional indoor housing | Meat                  |
|         | [33]   | Finishing                | Conventional indoor housing | Meat                  |
|         | [34]   | Fattening                | Experimental setup          | Meat                  |
|         | [35]   | Fattening                | Conventional indoor housing | Meat                  |
|         | [36]   | Finishing                | Conventional indoor housing | Meat                  |
|         | [37]   | Fattening                | Conventional indoor housing | Meat                  |
|         | [15]   | Fattening                | Conventional indoor housing | Meat                  |
|         | [38]   | Not possible to retrieve | Experimental setup          | Meat                  |
|         | [39]   | Fattening                | Conventional indoor housing | Meat                  |
|         | [40]   | Fattening                | Conventional indoor housing | Meat                  |
|         | [41]   | Fattening                | Conventional indoor housing | Meat                  |
| Poultry | [42]   | 14 day old               | Experimental setup          | Unclear               |
|         | [43]   | Newborn chicks           | Experimental setup          | Unclear               |
|         | [14]   | 7 day old                | Experimental setup          | Meat                  |
|         | [44]   | N/A                      | Experimental setup          | Unclear               |
|         | [45]   | 30 day old               | Dark House                  | Meat                  |
|         | [46]   | 15 day old               | Experimental setup          | Unclear               |
| Bovine  | [47]   | Calves                   | Auction                     | Beef                  |
|         | [13]   | Calves                   | Indoor group housing        | Dairy                 |
|         | [48]   | Calves                   | Indoor group housing        | Dairy                 |
|         | [16]   | Calves                   | Indoor group housing        | Dairy                 |
